# Supplementary material
Source: PubMed Central journal article supplement (PMC6014048)
Supplement: Supp_Table1.pdf [file Supp_Table1.pdf]

## Supplementary Data

SUPPLEMENTARY TABLE S1. BASELINE CHARACTERISTICS ACCORDING TO ANNUALIZED CONTINUOUS GLUCOSE MONITORING USE

|                                                    | <i>Annualized CGM use</i>       |                                 |                                 | P*   |
|----------------------------------------------------|---------------------------------|---------------------------------|---------------------------------|------|
|                                                    | <i>0–2 days per week (n=24)</i> | <i>3–5 days per week (n=54)</i> | <i>6–7 days per week (n=42)</i> |      |
| Age (years)                                        | 12.2±2.9                        | 13.0±2.5                        | 12.7±2.7                        | 0.53 |
| Diabetes duration (years)                          | 6.0±3.5                         | 5.9±3.4                         | 6.4±3.8                         | 0.81 |
| Sex, male                                          | 63%                             | 39%                             | 60%                             | 0.83 |
| Race, white                                        | 96%                             | 91%                             | 100%                            | 0.28 |
| BMI z-score (SDS)                                  | 0.45±0.99                       | 0.63±1.01                       | 0.38±0.92                       | 0.44 |
| Insulin regimen, pump                              | 83%                             | 85%                             | 83%                             | 0.96 |
| Blood glucose monitoring frequency (times per day) | 6.4±2.7                         | 6.3±2.5                         | 7.3±2.1                         | 0.09 |
| HbA <sub>1c</sub> (%)                              | 8.1±0.6                         | 8.0±0.8                         | 7.9±0.9                         | 0.74 |
| Family structure, two-parent                       | 96%                             | 89%                             | 95%                             | 0.87 |
| Household income, >\$100K                          | 39%                             | 45%                             | 68%                             | 0.02 |
| Parental education, college or above               | 67%                             | 72%                             | 76%                             | 0.41 |

\*P-value for analysis of variance or Mantel–Haenszel Chi-square tests.

BMI, body mass index; HbA<sub>1c</sub>, glycated hemoglobin; SDS, standard deviation score.
