# Supplementary material
Source: PubMed Central journal article supplement (PMC6014048)
Supplement: Supp_Table2.pdf [file Supp_Table2.pdf]

SUPPLEMENTARY TABLE S2. PSYCHOSOCIAL  
SURVEY SCORES OVER TIME

|                 | <i>Baseline</i><br>(n = 120) | <i>6 months</i><br>(n = 113) | <i>12 months</i><br>(n = 108) |
|-----------------|------------------------------|------------------------------|-------------------------------|
| CES-DC          | 10 ± 9                       | 9 ± 8                        | 9 ± 7                         |
| PAID-Peds       | 29 ± 23                      | 25 ± 20                      | 24 ± 20                       |
| PedsQL-generic  | 86 ± 14                      | 88 ± 12                      | 89 ± 11                       |
| PedsQL-diabetes | 80 ± 13                      | 83 ± 13*                     | 83 ± 13*                      |

All results are expressed as mean ± standard deviation.

\* $p < 0.05$  for difference from baseline.

CES-DC, Center for Epidemiologic Studies Depression Scale for Children; PAID-Peds, Problem Areas in Diabetes survey—Pediatric version; PedsQL, Pediatric Quality of Life Inventory.
